# Supplementary material
Source: PubMed Central journal article supplement (PMC3769455)
Supplement: NIHMS486802-supplement-1.pdf [file NIHMS486802-supplement-1.pdf]

## Supplementary Information

### **FGF21 contributes to neuroendocrine control of female reproduction**

Bryn M. Owen<sup>1</sup>, Angie L. Bookout<sup>1,2</sup>, Xunshan Ding<sup>3</sup>, Vicky Y. Lin<sup>1</sup>, Stan D. Atkin<sup>1</sup>,  
Laurent Gautron<sup>2</sup>, Steven A. Kliewer<sup>1,3\*</sup>, and David J. Mangelsdorf<sup>1,4\*</sup>

<sup>1</sup>Department of Pharmacology; <sup>2</sup>Division of Hypothalamic Research, Department of Internal Medicine; <sup>3</sup>Department of Molecular Biology; <sup>4</sup>Howard Hughes Medical Institute, University of Texas Southwestern Medical Center, Dallas TX 75390 USA

\*To whom correspondence should be addressed. Email:

[steven.kliewer@utsouthwestern.edu](mailto:steven.kliewer@utsouthwestern.edu); [davo.mango@utsouthwestern.edu](mailto:davo.mango@utsouthwestern.edu)

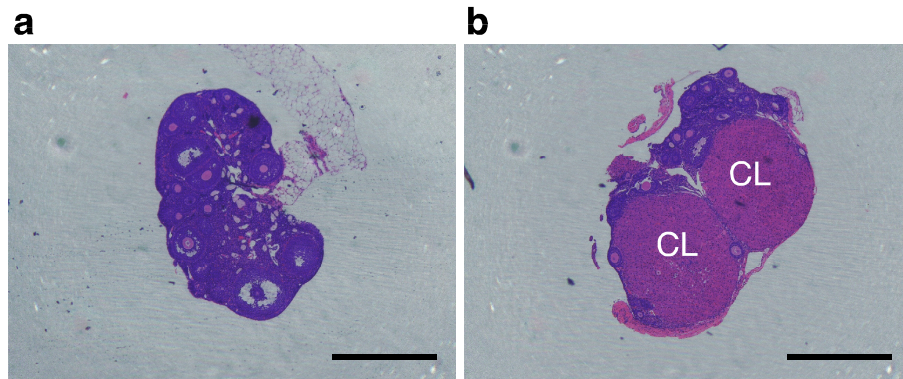

**Supplementary Figure 1** Ovaries from Tg(Fgf21) mice are functional when transplanted in to wild-type recipients. (a) Histological image of an ovary from an Tg(Fgf21) mouse. (b) Image of a transplanted Tg(Fgf21) ovary taken from a pregnant wild-type recipient after mating with a wild-type male. Note the enlarged corpora lutea (CL) in the ovary from the transplanted wild-type female. Confirmation of successful transplant was by PCR identification of the Fgf21-transgene in one half of a bisected ovary and in at least one fetus. Bar = 500  $\mu$ m.

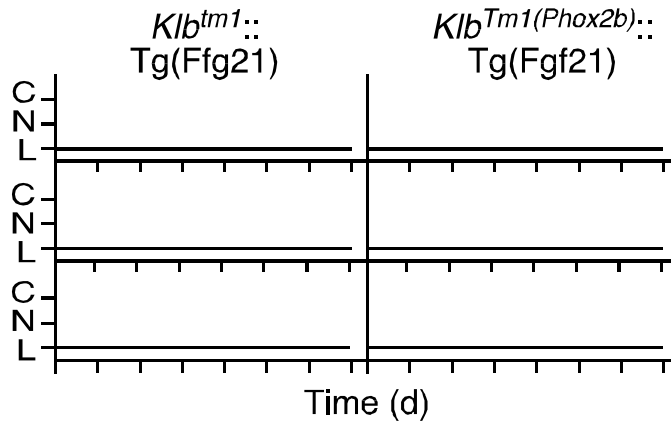

**Supplementary Figure 2** Suppression of female infertility in Tg(Fgf21) mice is unaffected in the hindbrain knockout of *Klb*. Representative examples of estrous cycles in *Klb<sup>tm1</sup>::Tg(Fgf21)* and *Klb<sup>tm1(Phox2b)</sup>::Tg(Fgf21)* mice. Estrous cycling was determined by vaginal cytology (C: cornified cells [estrus], N: nucleated cells [proestrus], L: leukocytes [diestrus]).

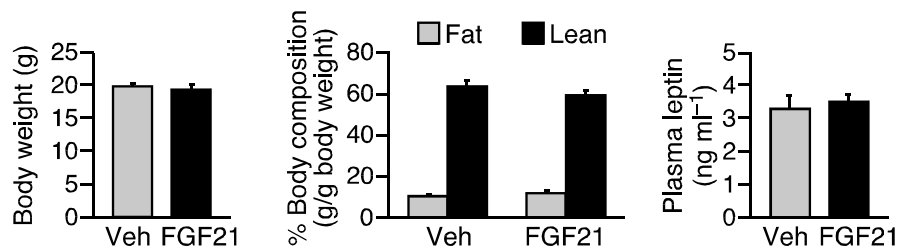

**Supplementary Figure 3** Body weight and composition, and plasma leptin levels in female mice treated with recombinant FGF21. Human FGF21 was administered by mini-pump infusion for 7 d ( $n = 6$ ).
